# Supplementary material for: Fabrication of Silver Nanoparticles Using a Gas Phase Nanocluster Device and Preliminary Biological Uses
Source: MDPI journal article supplement (doi:10.3390/ma11122574), 2018-12-18

## Supplementary Material

Supplementary material shows additional fluorescence image of cell cultures reported in the manuscript. These are the samples mentioned in Table 1 and the blank sample (Sample without silver NPs).

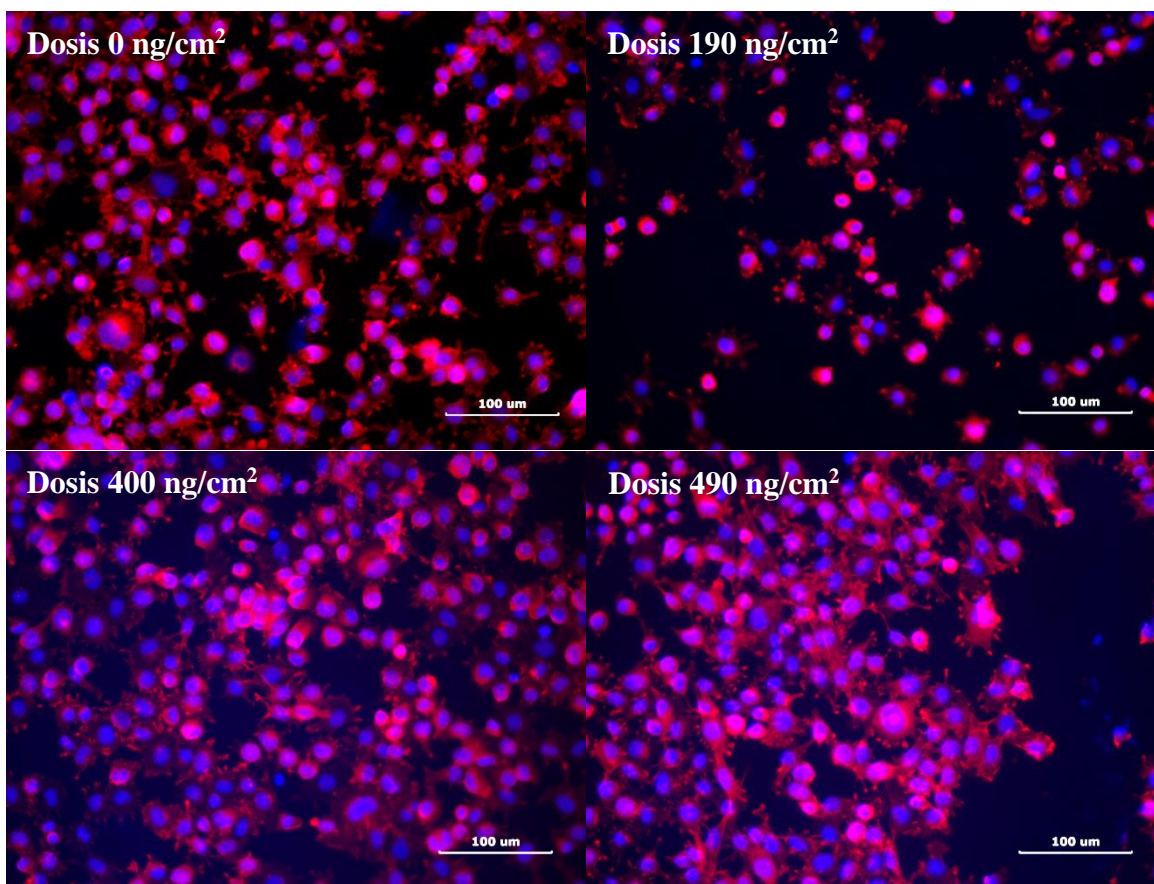

Supplement: s1 [file s1]
